# Supplementary material for: Effect of New Analogs of Hexyloxy Phenyl Imidazoline on Quorum Sensing in Chromobacterium violaceum and In Silico Analysis of Ligand-Receptor Interactions
Source: Hindawi journal article supplement (doi:10.1155/2020/8735190), 2020-02-25
Supplement: f1 [file 8735190.f1.pdf]

# SUPPLEMENTARY MATERIAL

## Selected Spectra

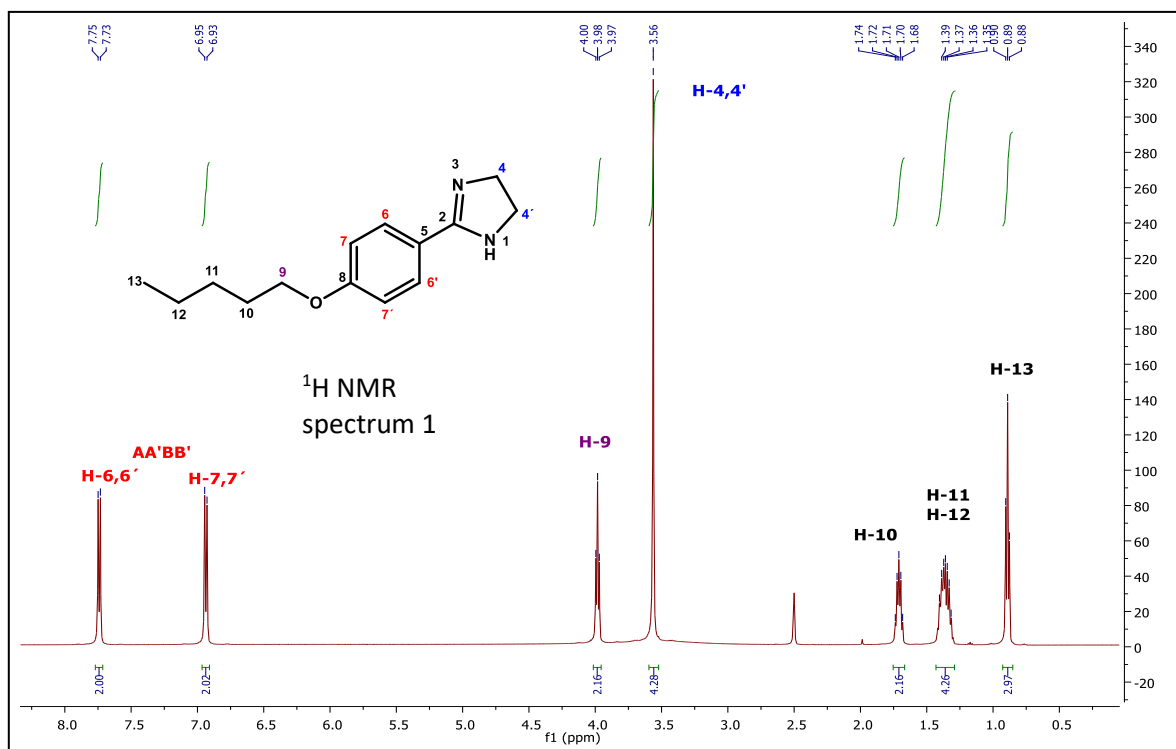

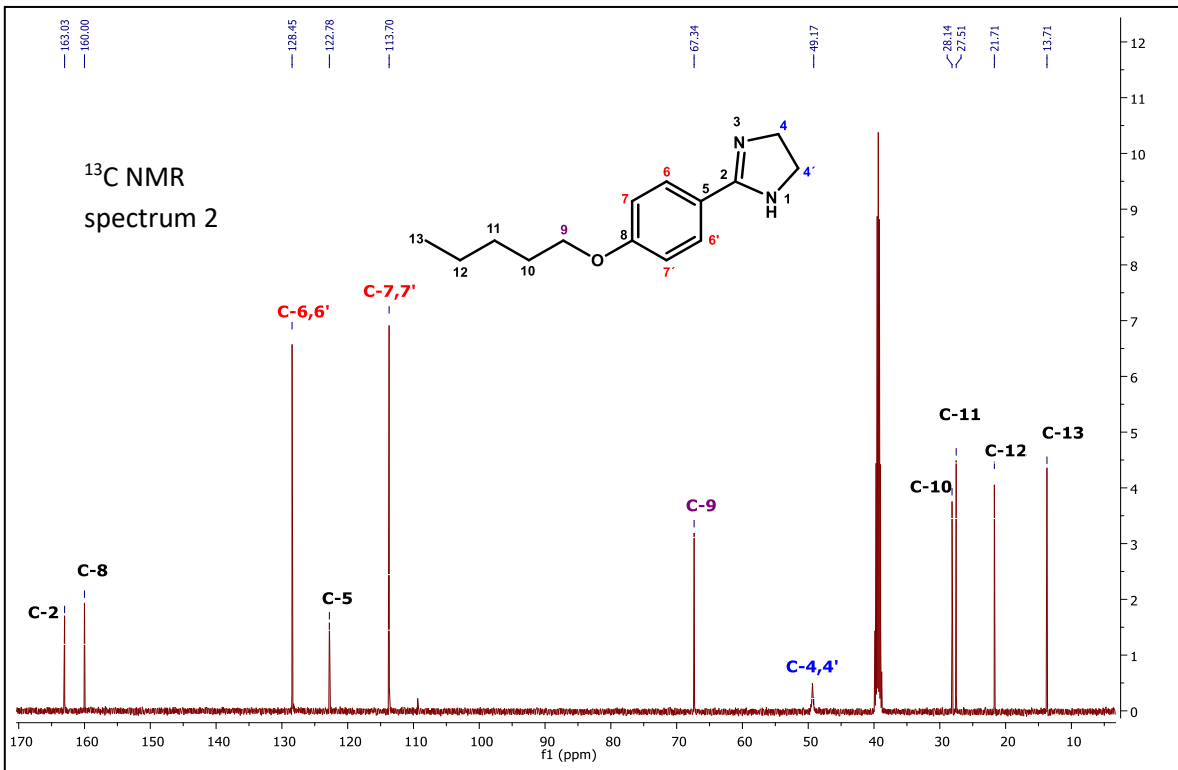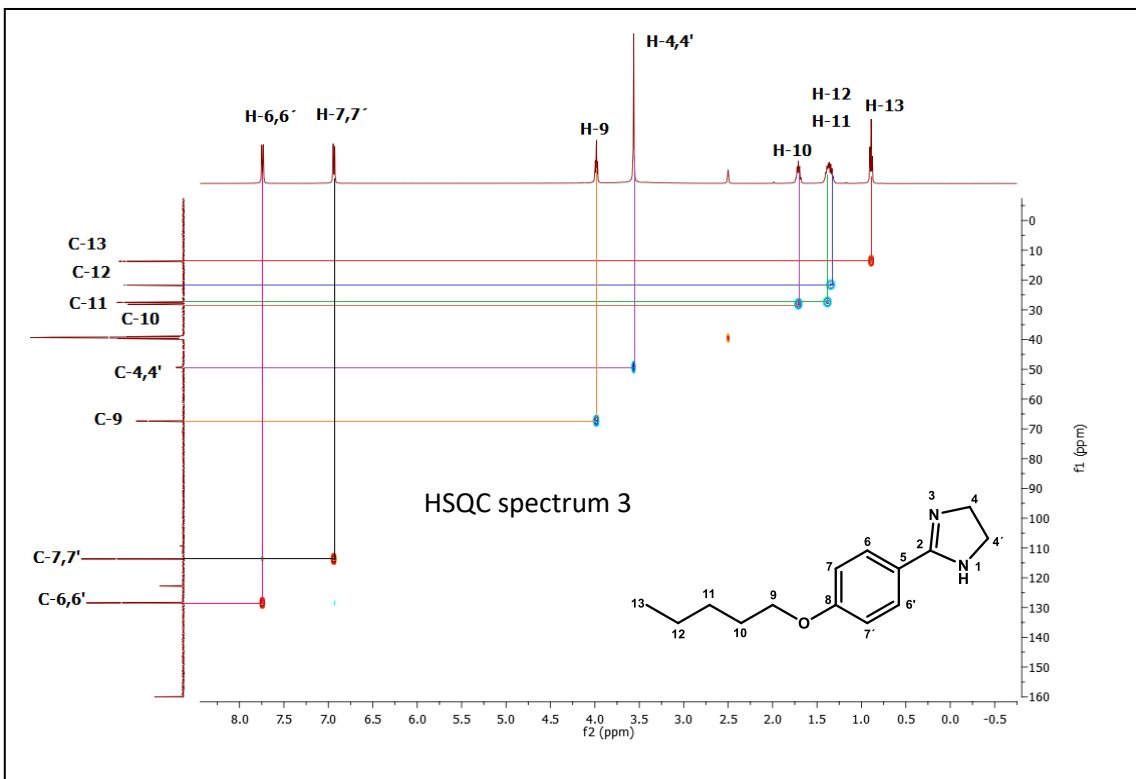

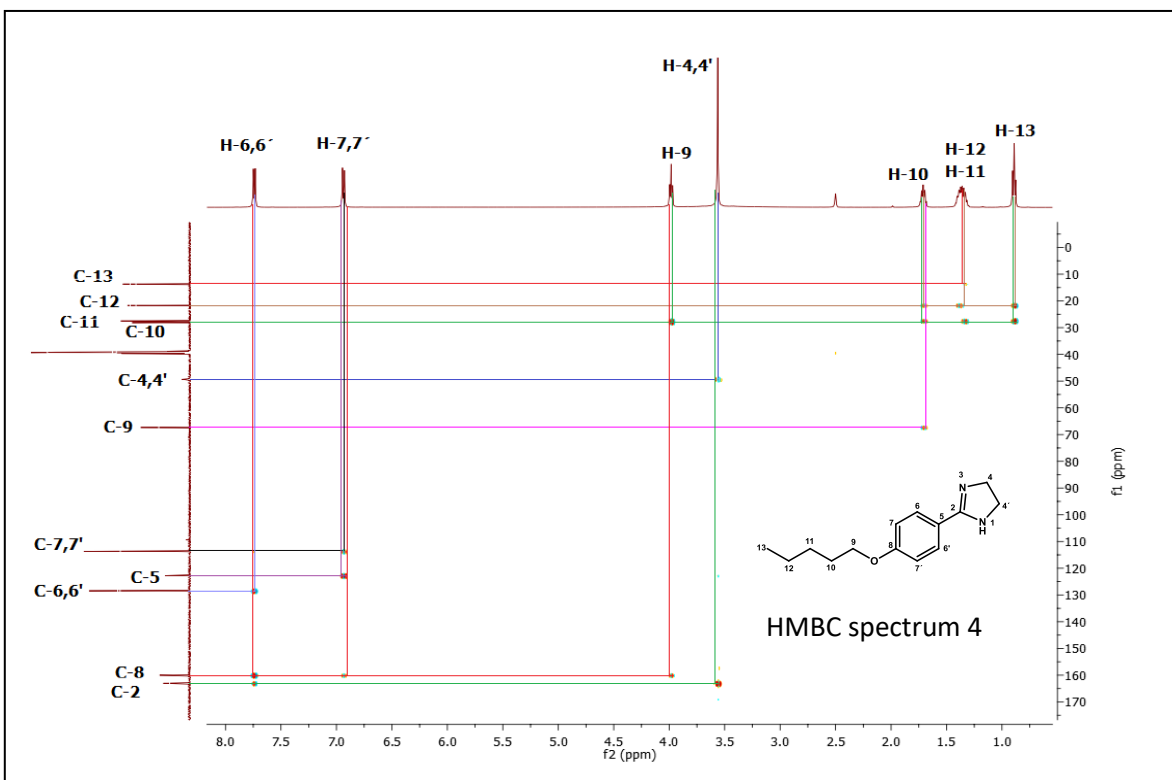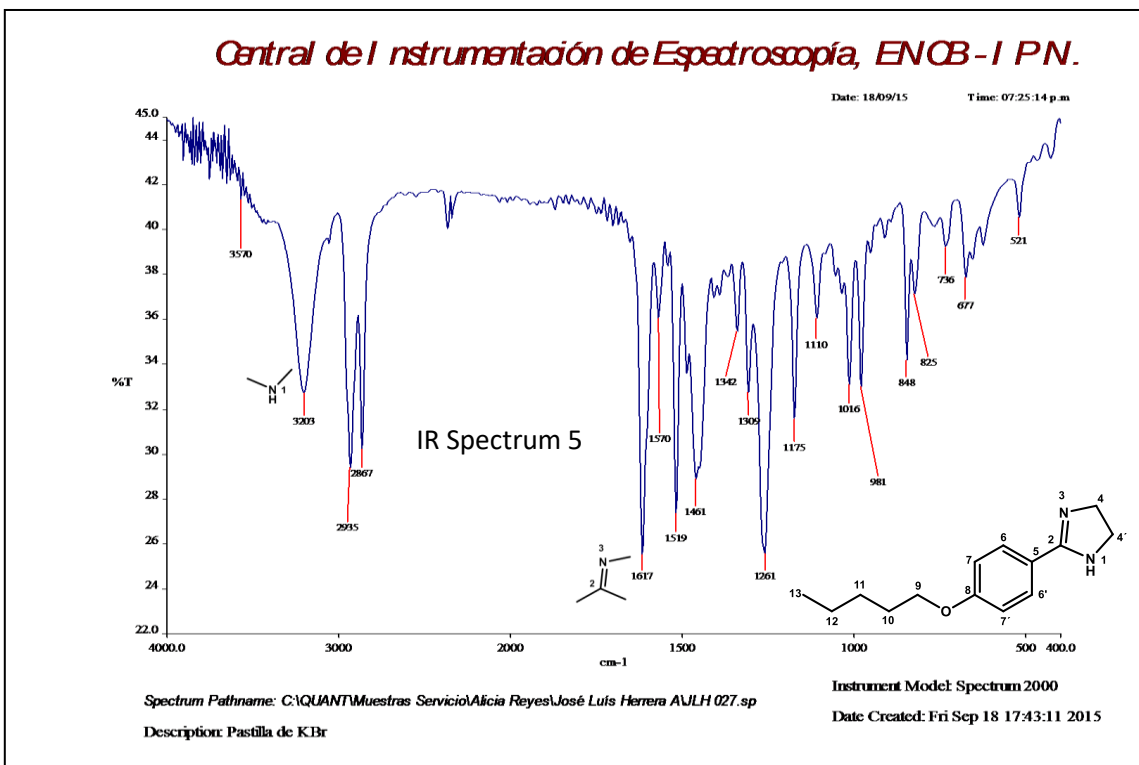

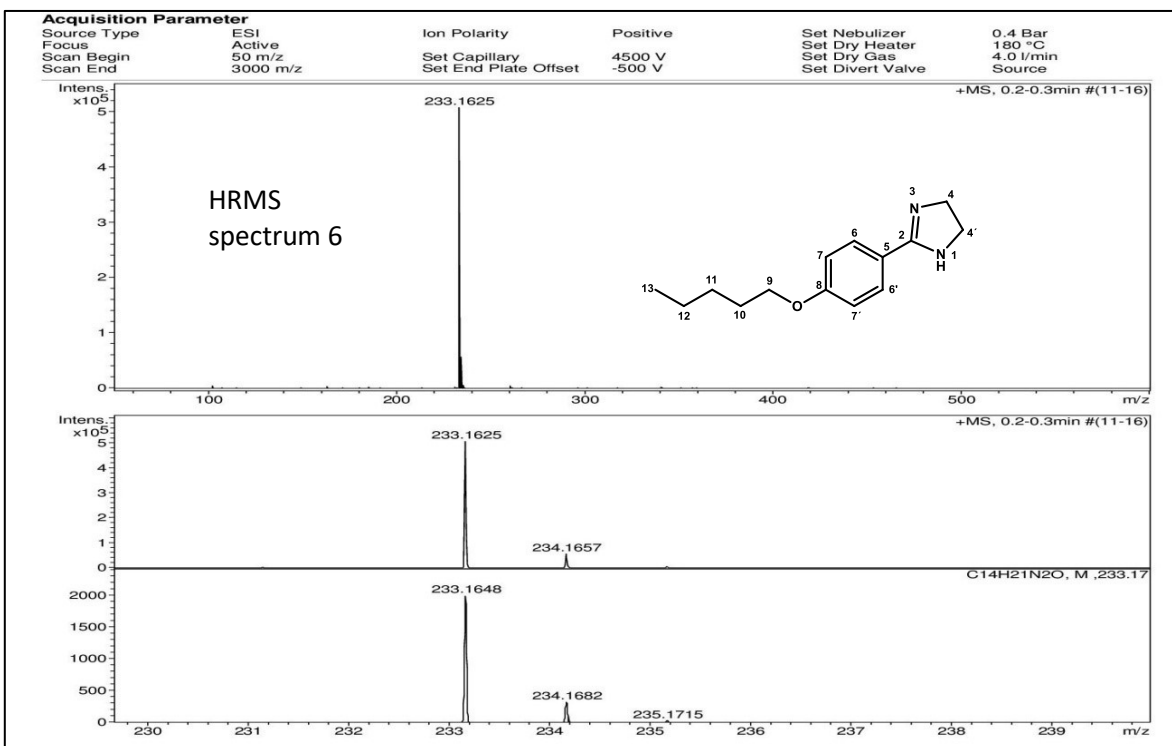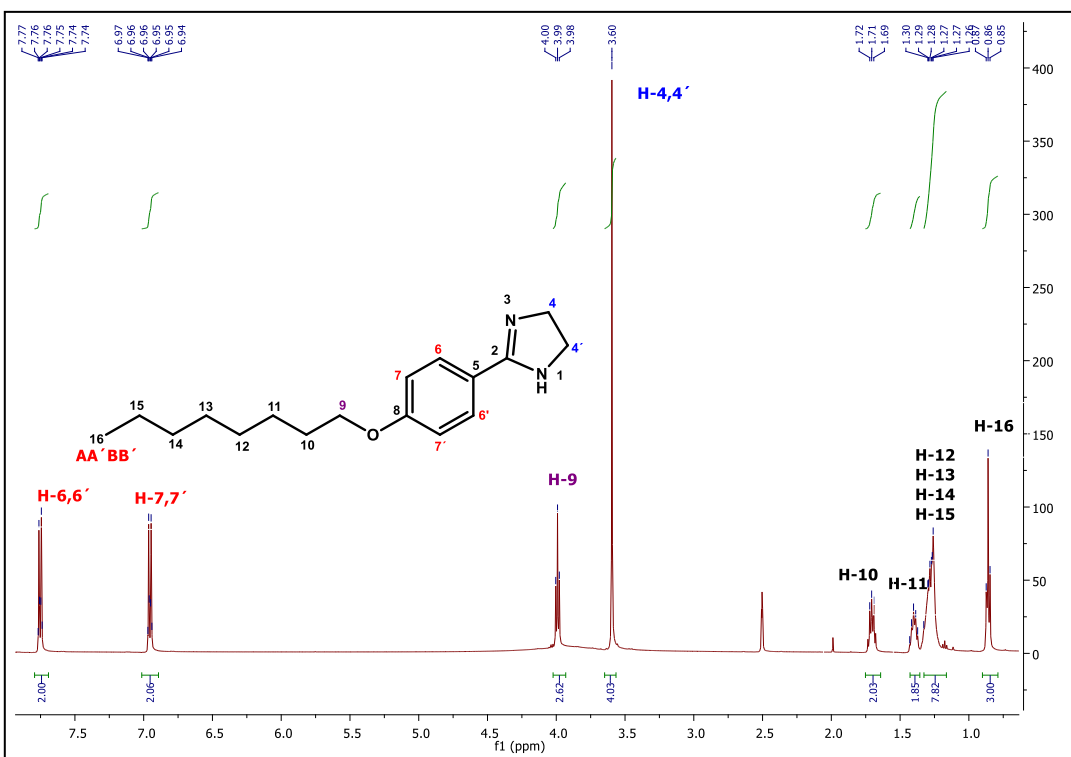

1H NMR spectrum 7

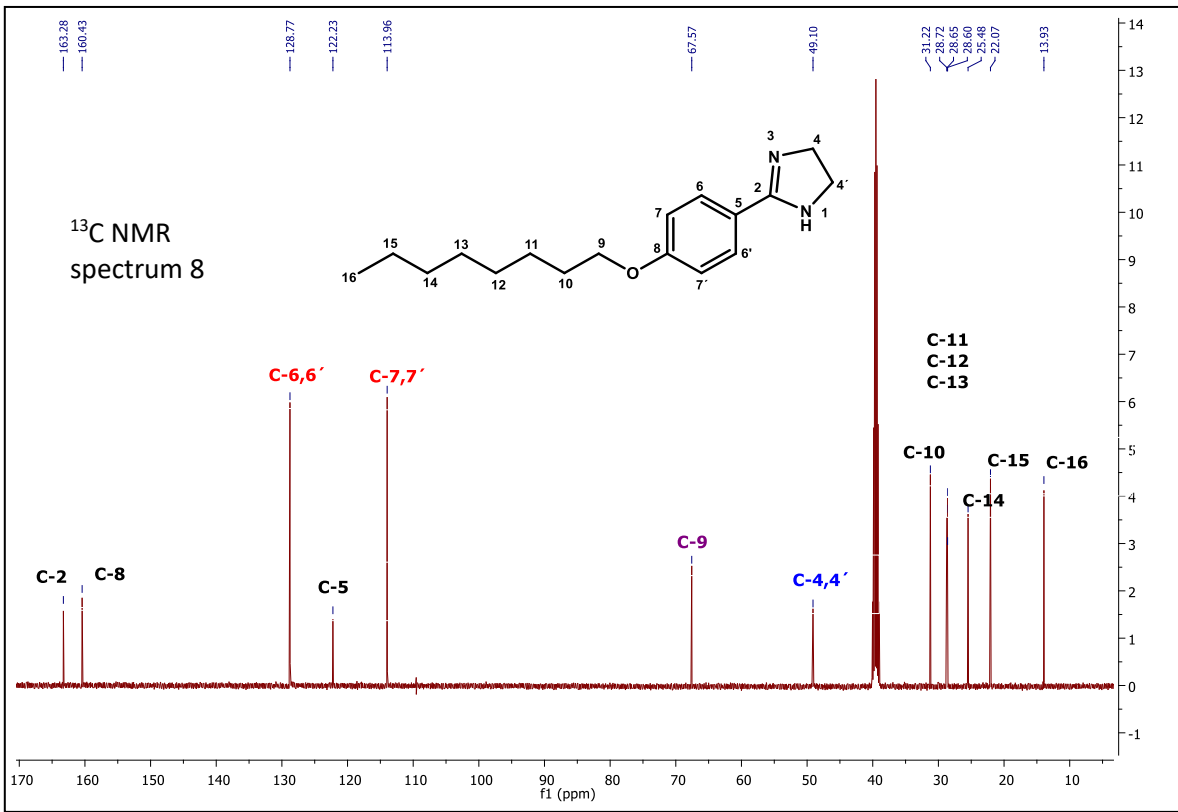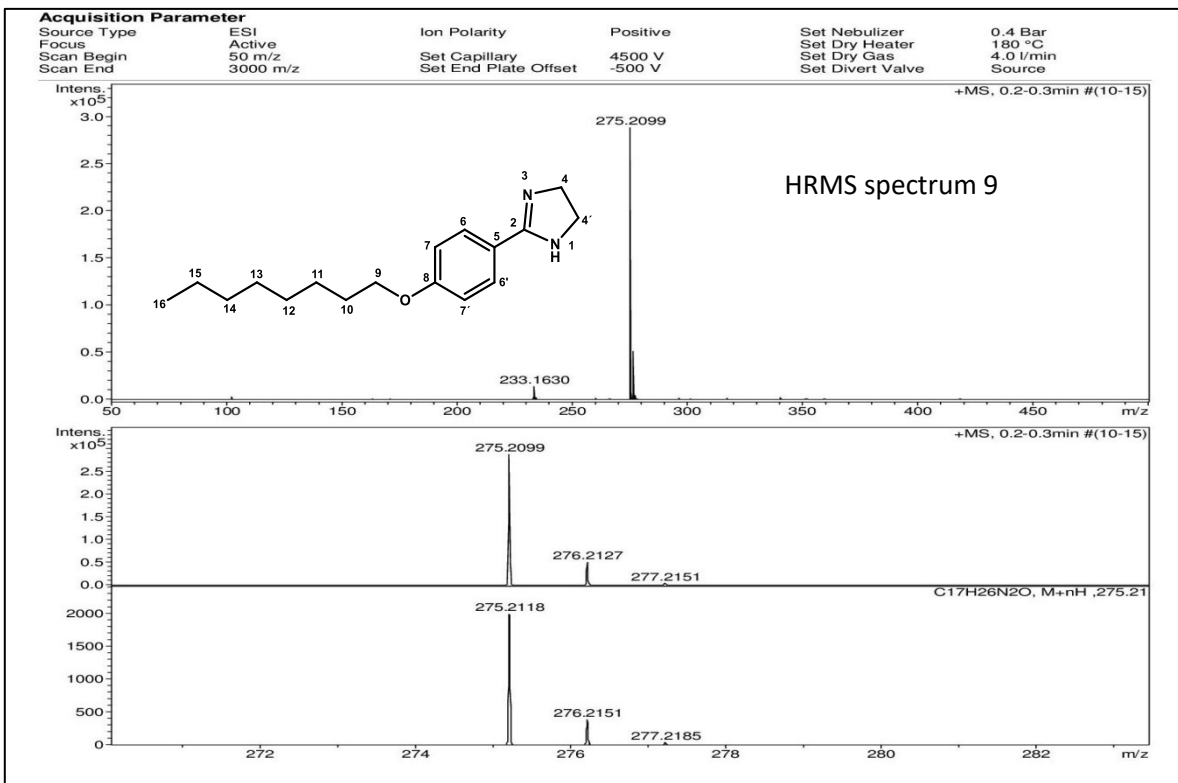

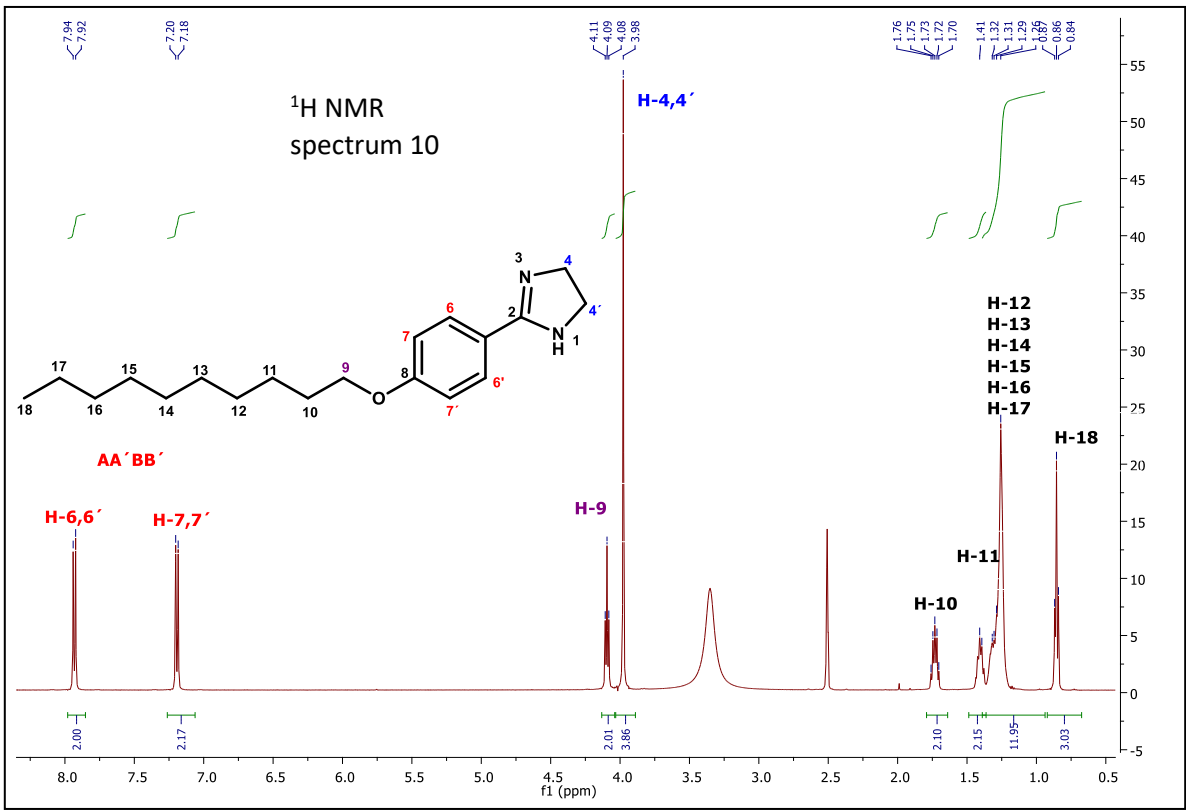

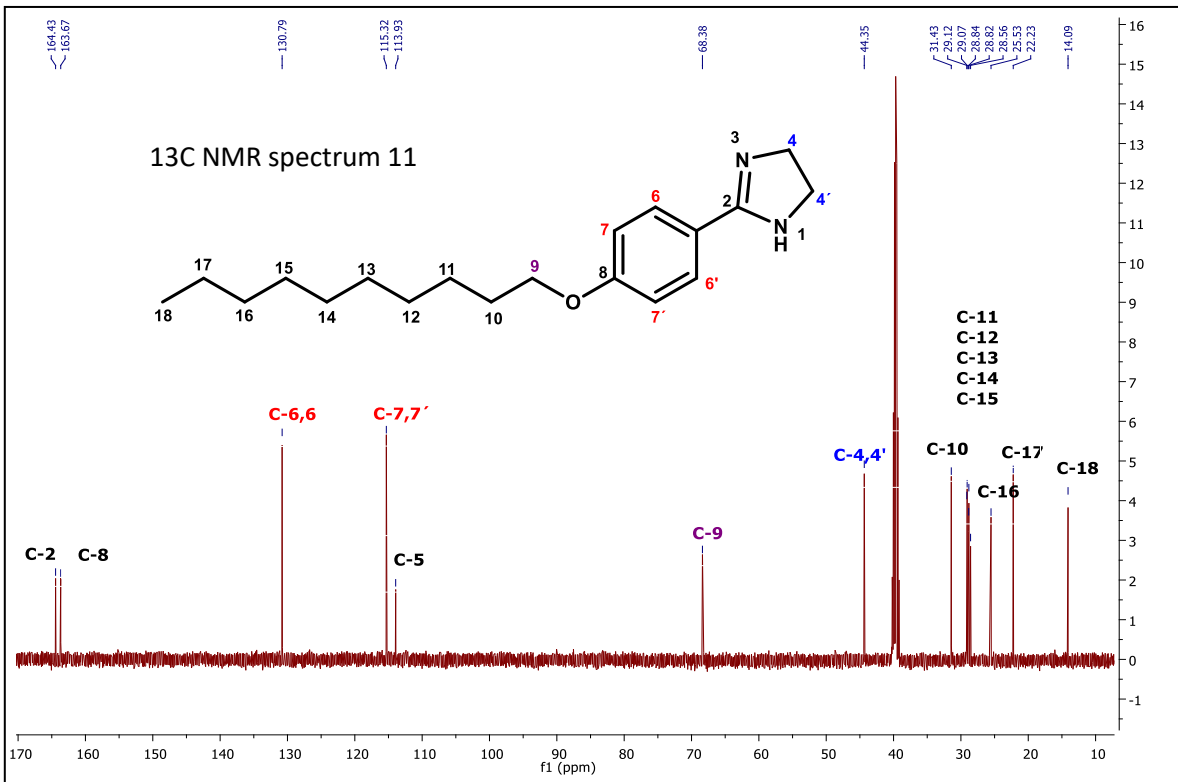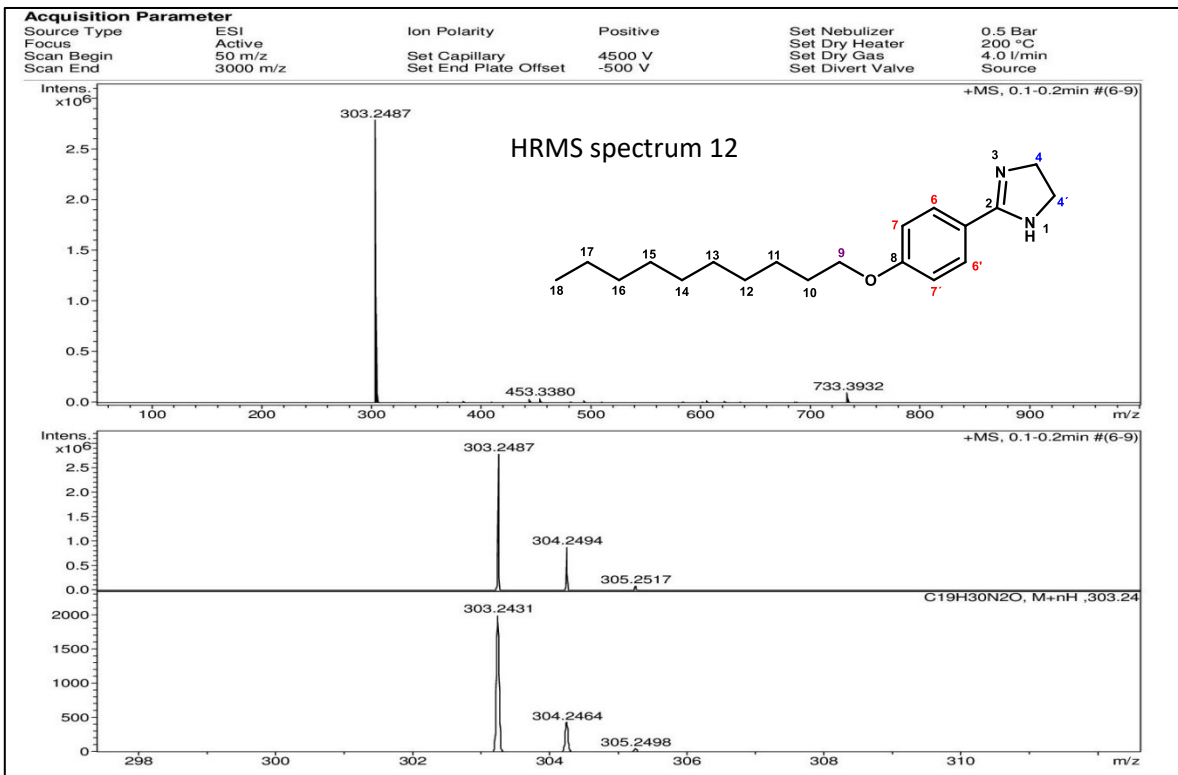

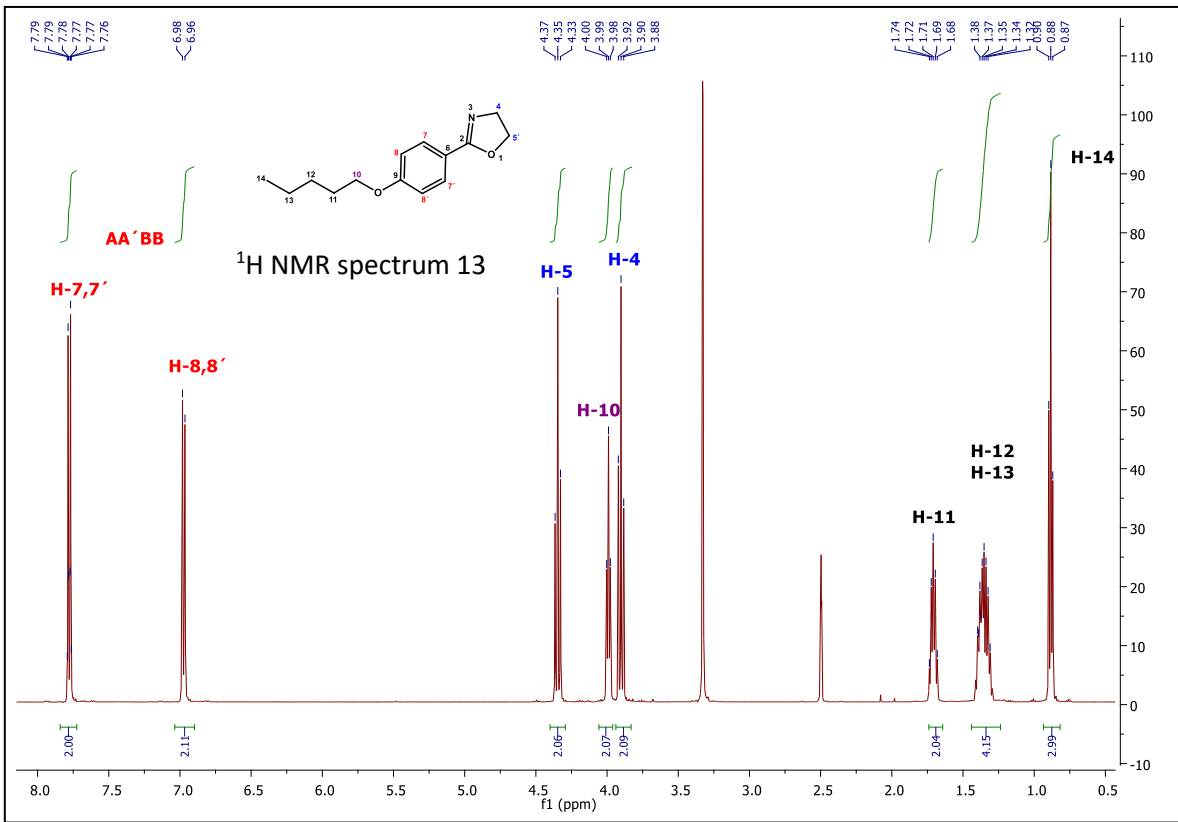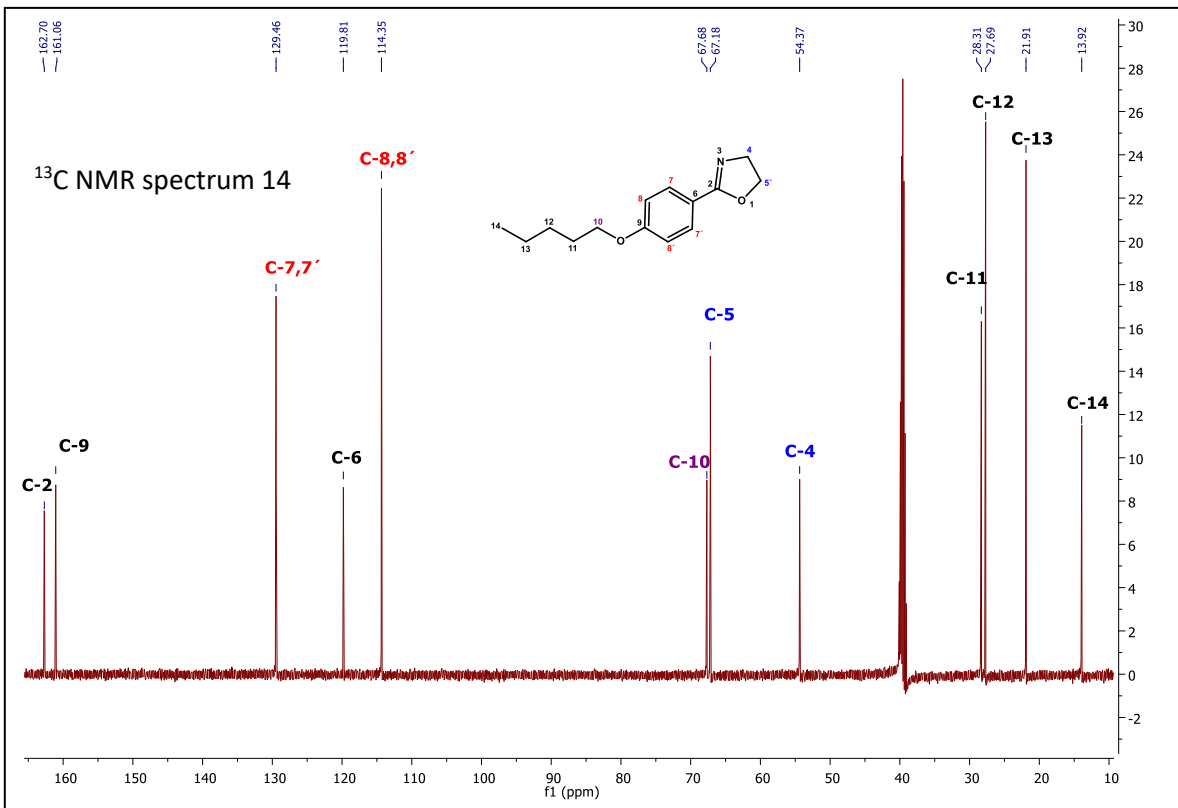



Central de Instrumentación de Espectroscopía, ENCB-IPN.

Date: 28/10/15

Time: 03:45:36 p.m

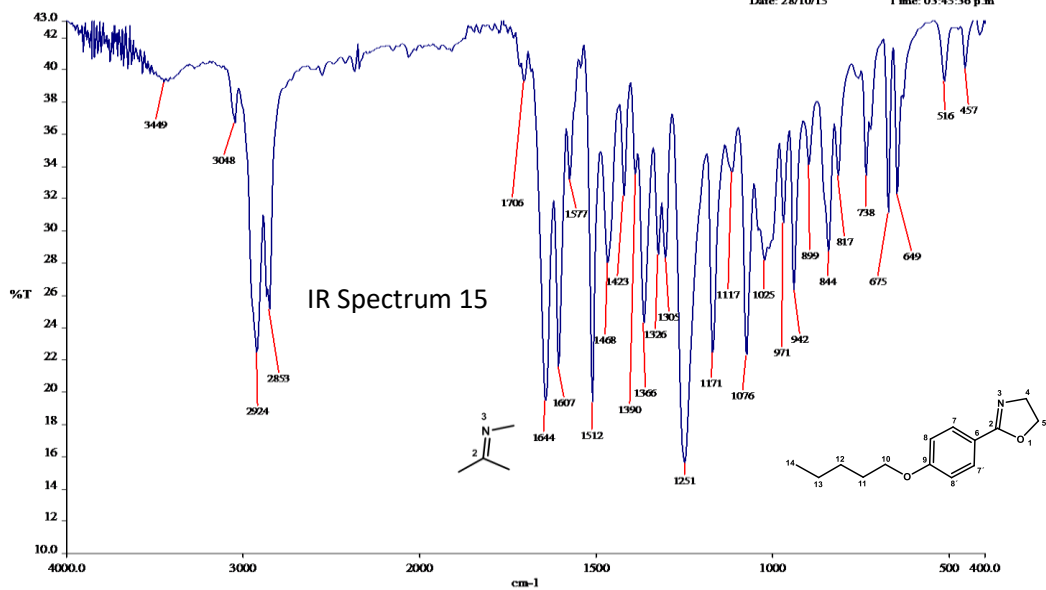

Spectrum Pathname: C:\QUANT\Muestras Servicio\Alicia Reyes\JLH 067.sp

Description: Pastilla de KBr

Instrument Model: Spectrum 2000

Date Created: Wed Oct 28 15:39:56 2015

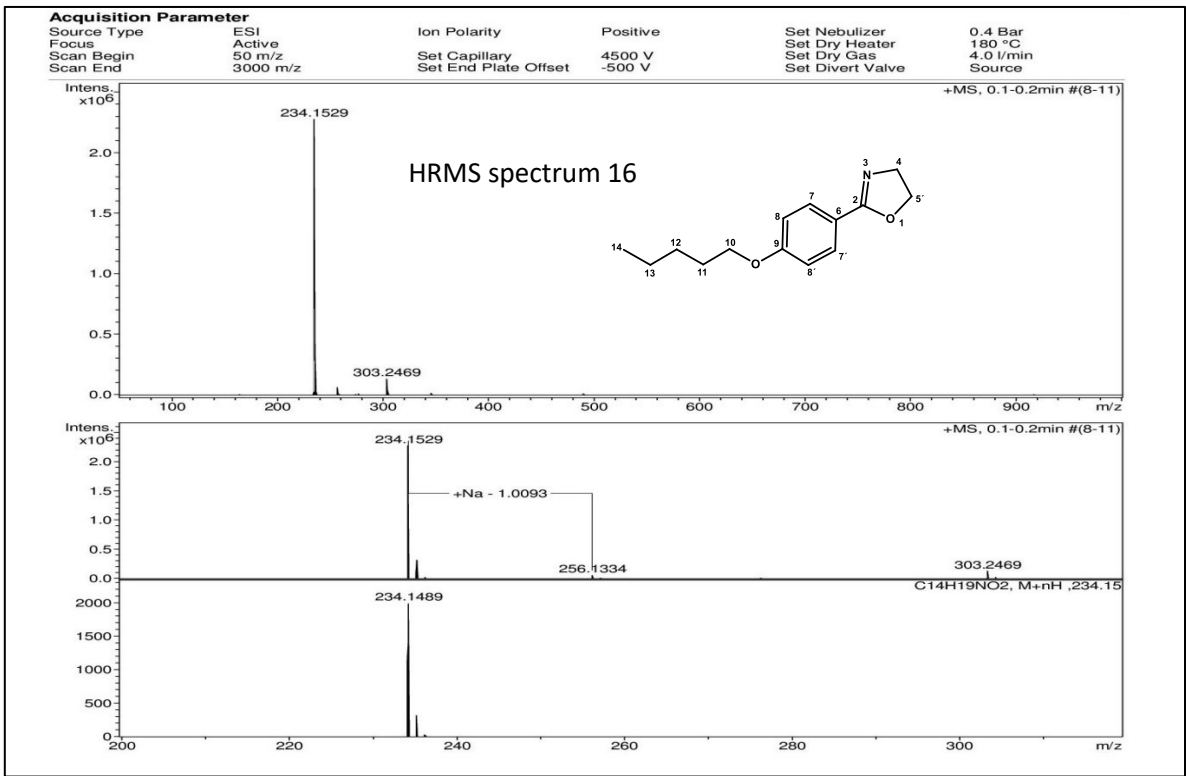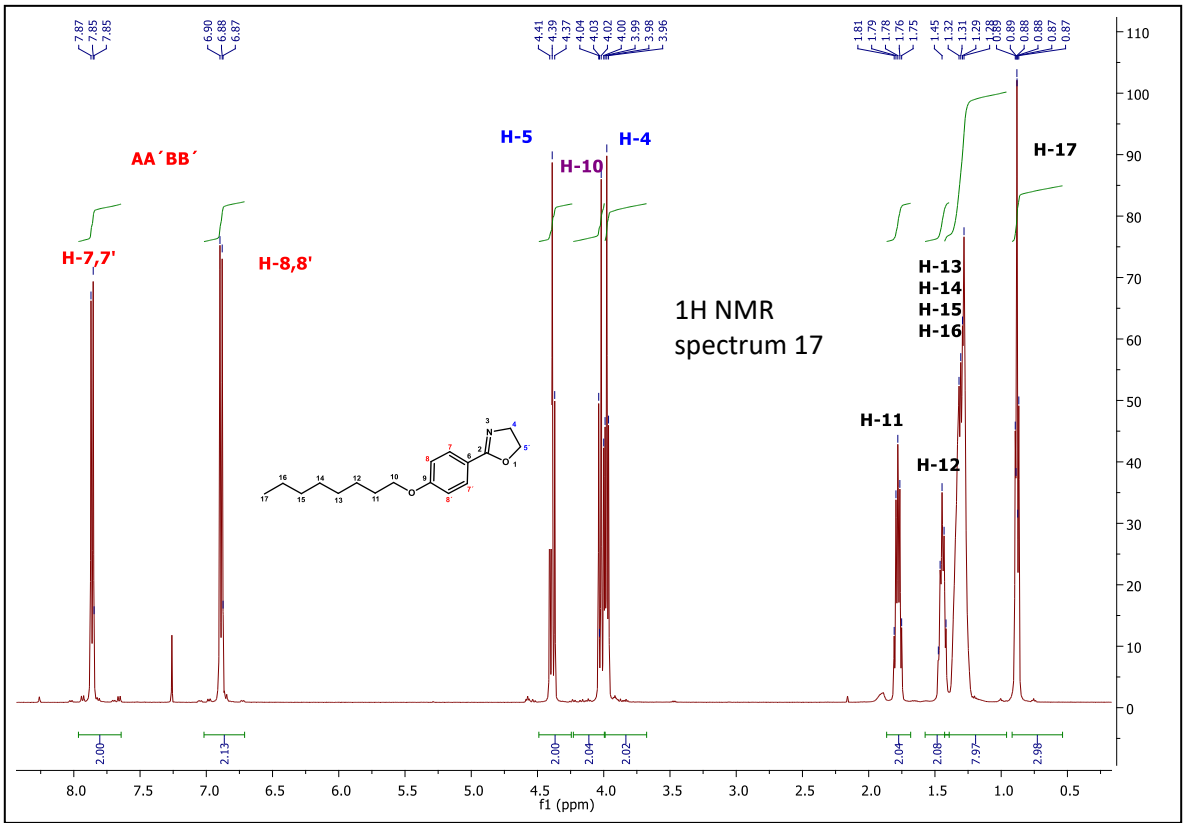

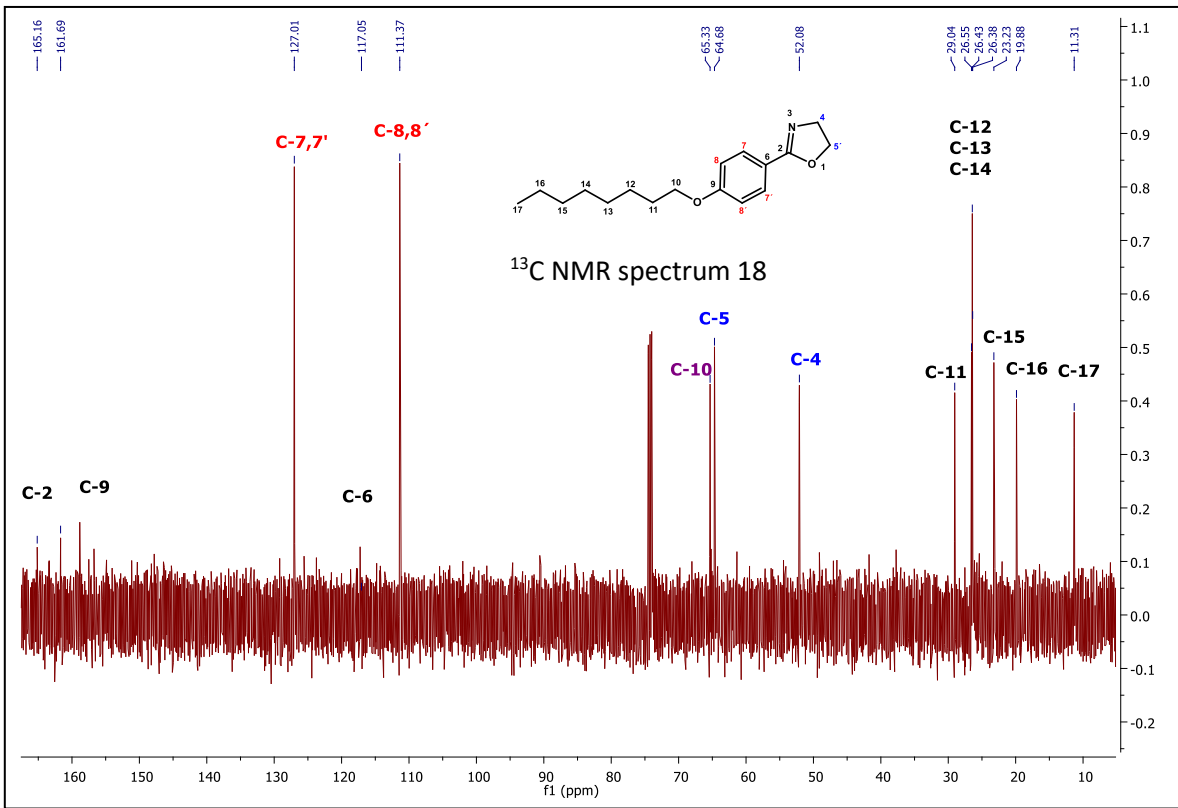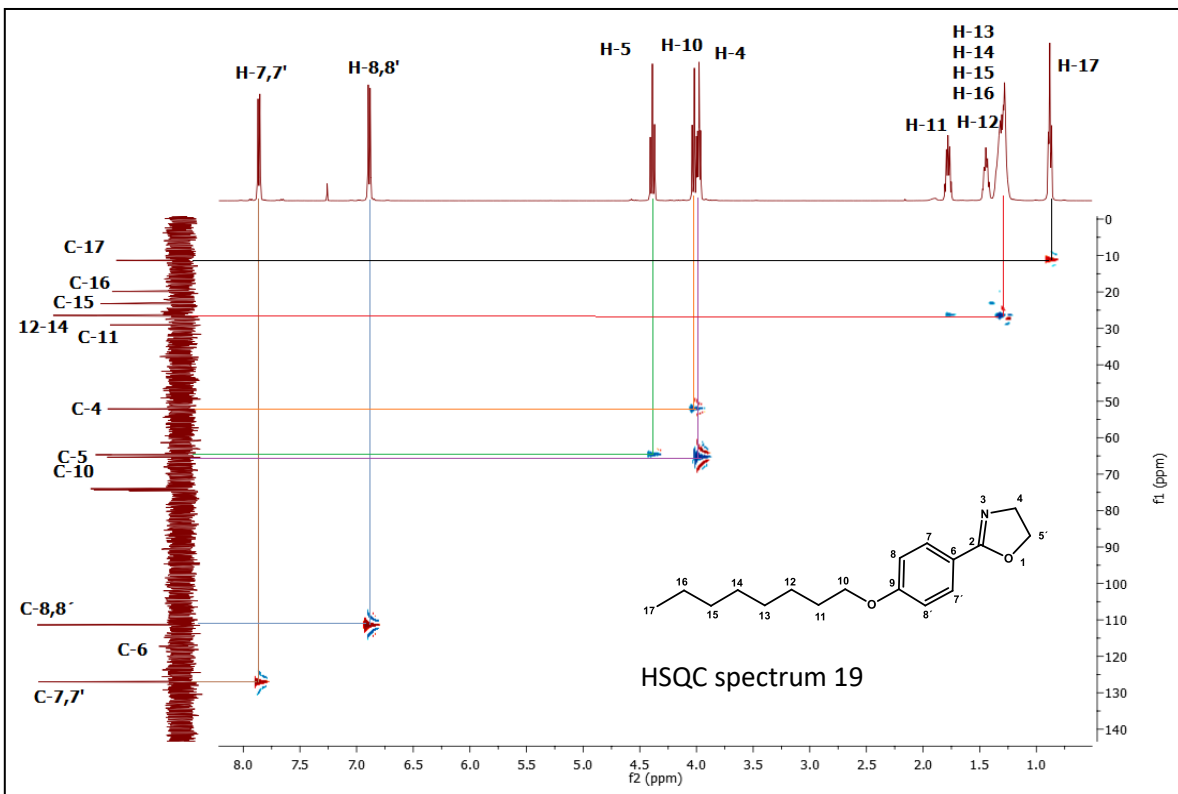

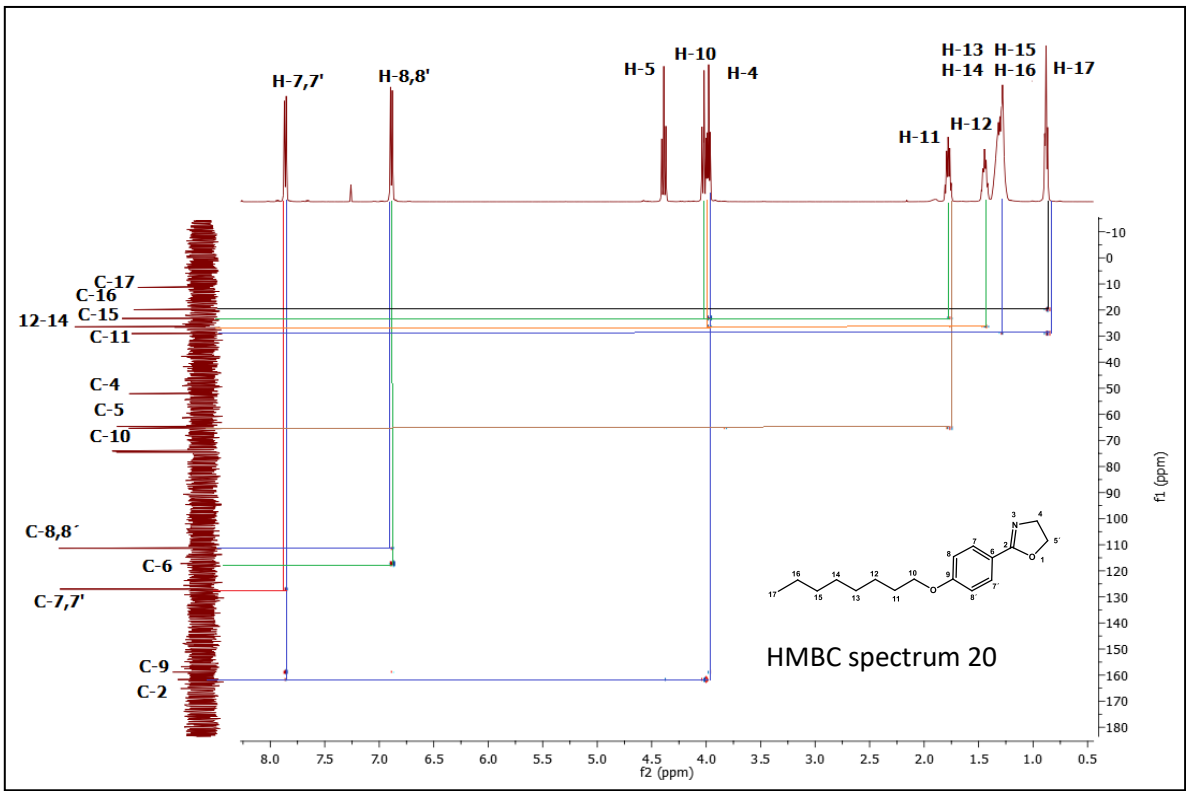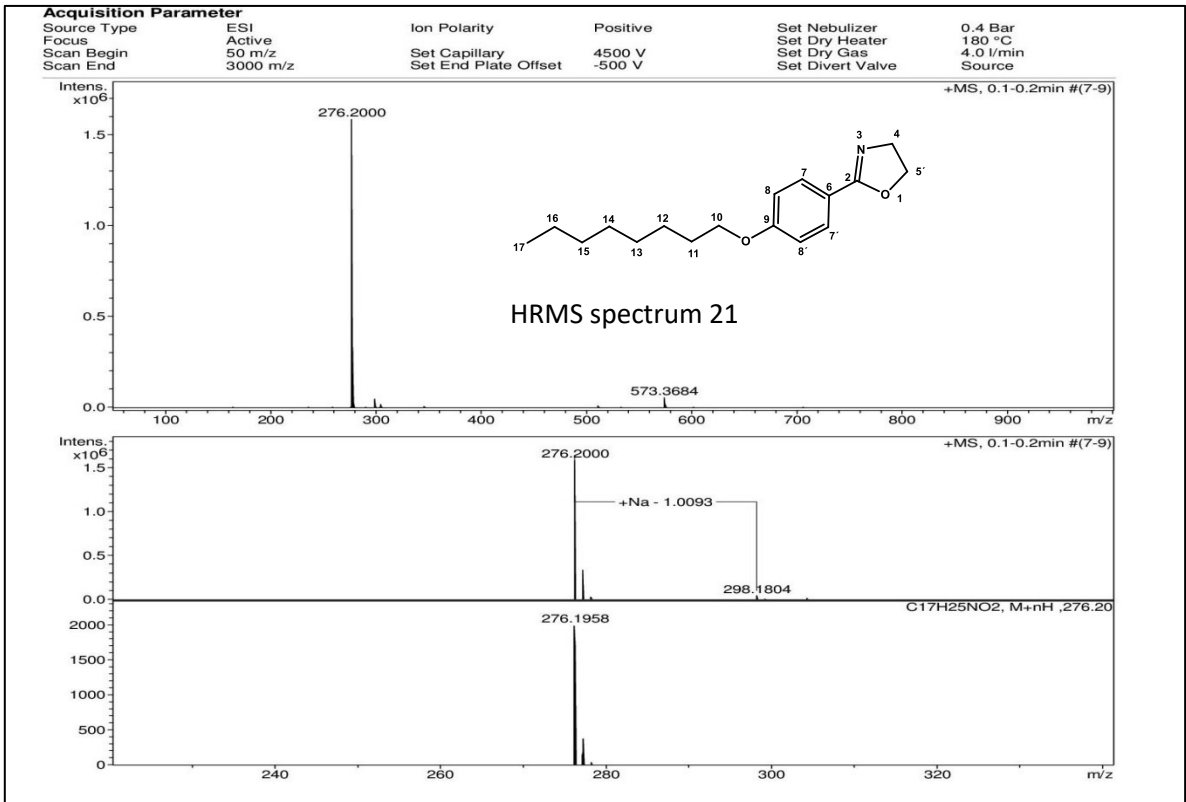

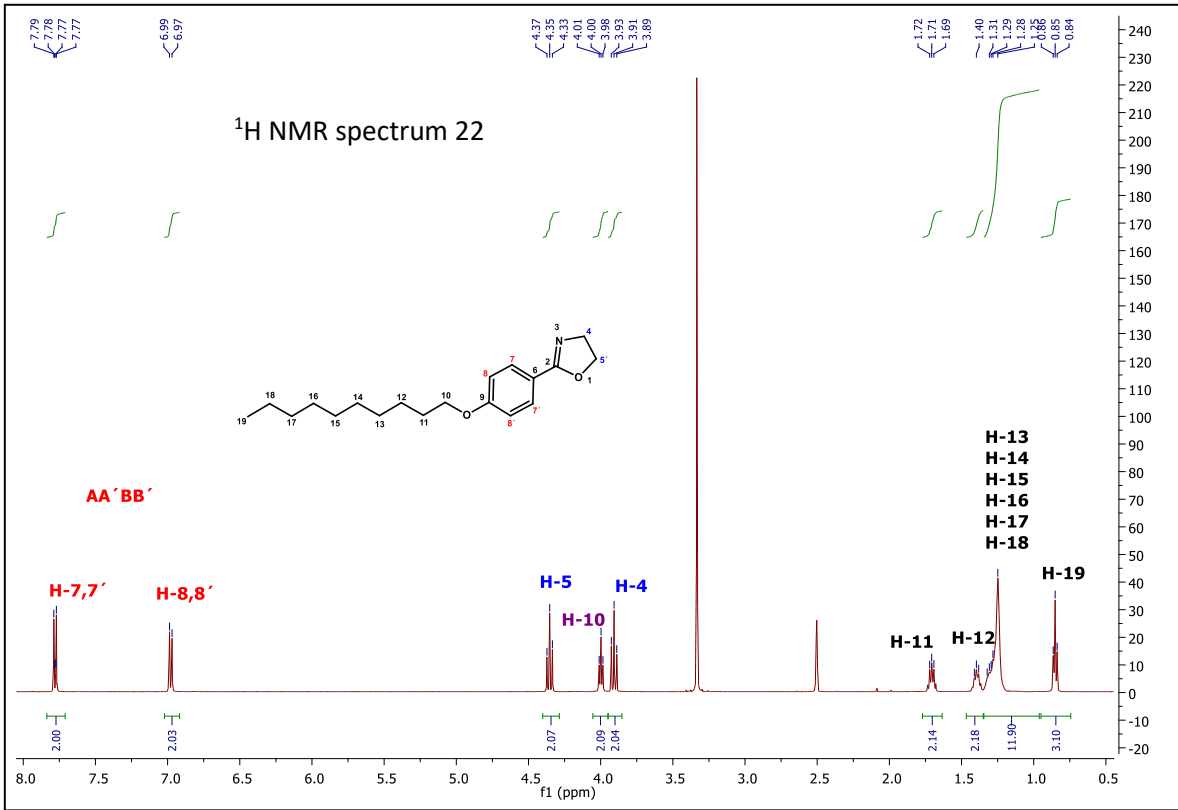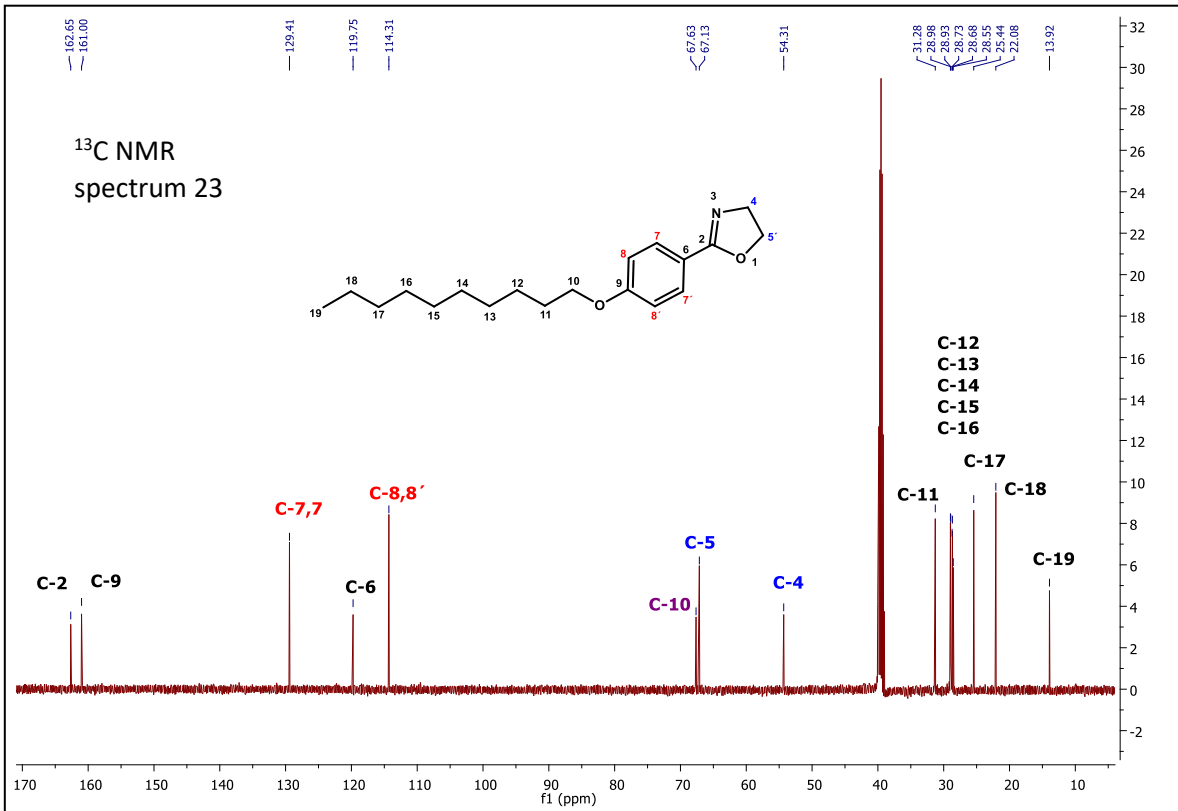

Central de Instrumentación de Espectroscopía, ENCB-IPN.

Date: 30/10/15 Time: 11:51:08 a.m

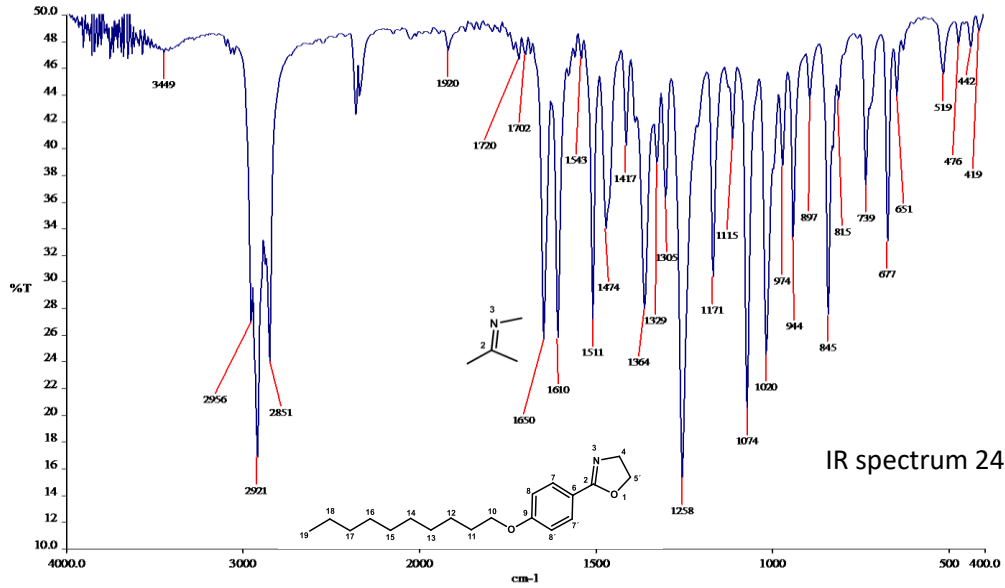

IR spectrum 24

Spectrum Pathname: C:\QUANT\Muestras Servicio\Alicia Reyes\JLH 077.sp

Instrument Model: Spectrum 2000

Description: Pastilla de KBr

Date Created: Fri Oct 30 11:44:37 2015

Acquisition Parameter

|             |          |                      |          |                  |           |
|-------------|----------|----------------------|----------|------------------|-----------|
| Source Type | ESI      | Ion Polarity         | Positive | Set Nebulizer    | 0.4 Bar   |
| Focus       | Active   | Set Capillary        | 4500 V   | Set Dry Heater   | 180 °C    |
| Scan Begin  | 50 m/z   | Set End Plate Offset | -500 V   | Set Dry Gas      | 4.0 l/min |
| Scan End    | 3000 m/z |                      |          | Set Divert Valve | Source    |

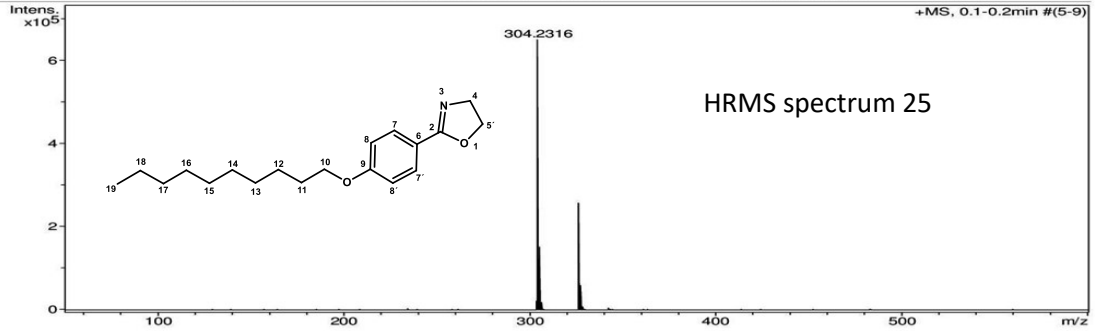

HRMS spectrum 25

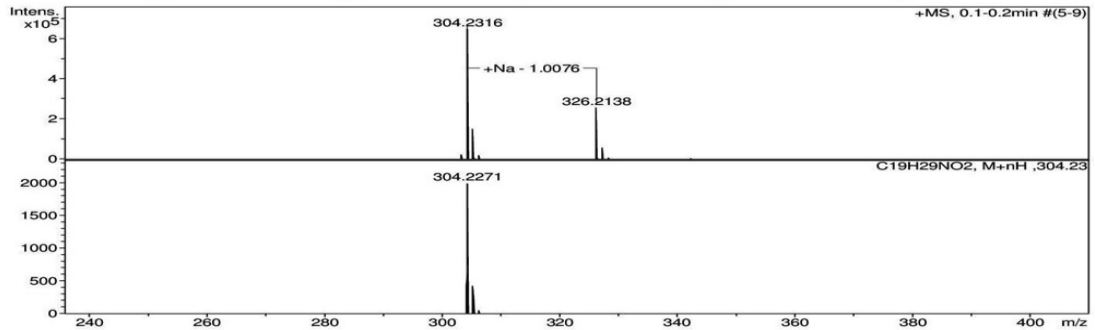

C<sub>19</sub>H<sub>29</sub>NO<sub>2</sub>, M+nH, 304.23
